# Supplementary material for: Direct and indirect immune effects of CMP-001, a virus-like particle containing a TLR9 agonist
Source: HighWire-hosted journal article supplement (doi:10.1136/jitc-2021-002484), 2021-06-01
Supplement: jitc-2021-002484supp002_data_supplement.pdf [file jitc-2021-002484supp002_data_supplement.pdf]

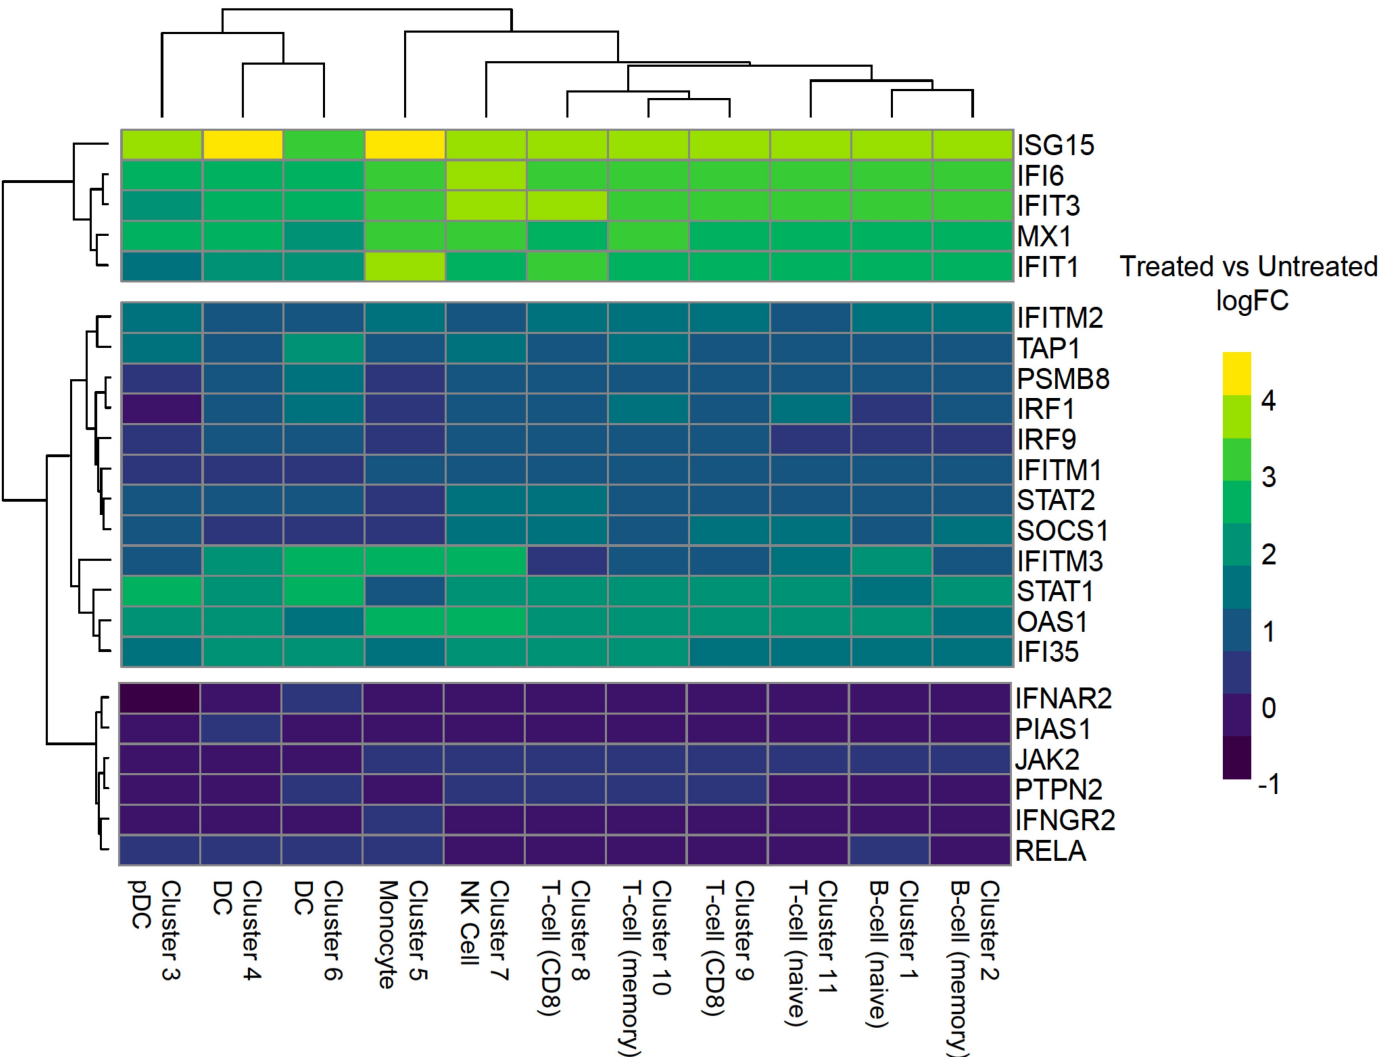

**Supplemental Figure 2. Expression of interferon response genes across clusters.** Single cell RNA sequencing was performed on unfractionated and untreated normal donor PBMCs and the same PBMCs treated with anti-Q $\beta$ -coated CMP-001. Expression of interferon response genes (rows) between treated and untreated cells across each cluster (columns) is shown. Data from one of two similar experiments are shown.
