# Supplementary material for: Direct and indirect immune effects of CMP-001, a virus-like particle containing a TLR9 agonist
Source: HighWire-hosted journal article supplement (doi:10.1136/jitc-2021-002484), 2021-06-01
Supplement: jitc-2021-002484supp005_data_supplement.pdf [file jitc-2021-002484supp005_data_supplement.pdf]

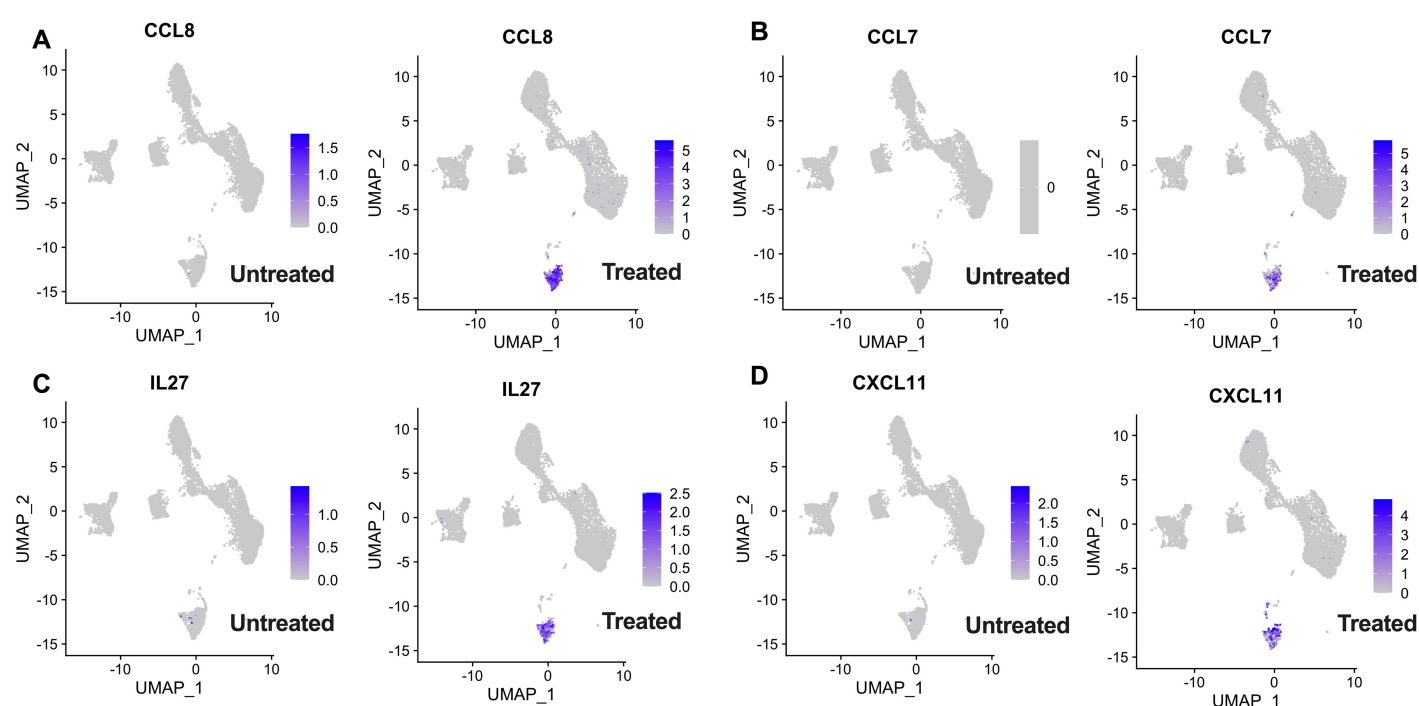

**Supplemental Figure 5. Anti-Q $\beta$ -coated CMP-001 induces expression of genes impacting T cell function.** UMAP plots of CCL8 (A), CCL7 (B), IL27 (C), and CXCL11 (D) untreated (left) and treated with anti-Q $\beta$ -coated CMP-001 (right).
