# Supplementary material for: Direct and indirect immune effects of CMP-001, a virus-like particle containing a TLR9 agonist
Source: HighWire-hosted journal article supplement (doi:10.1136/jitc-2021-002484), 2021-06-01
Supplement: jitc-2021-002484supp009_data_supplement.pdf [file jitc-2021-002484supp009_data_supplement.pdf]

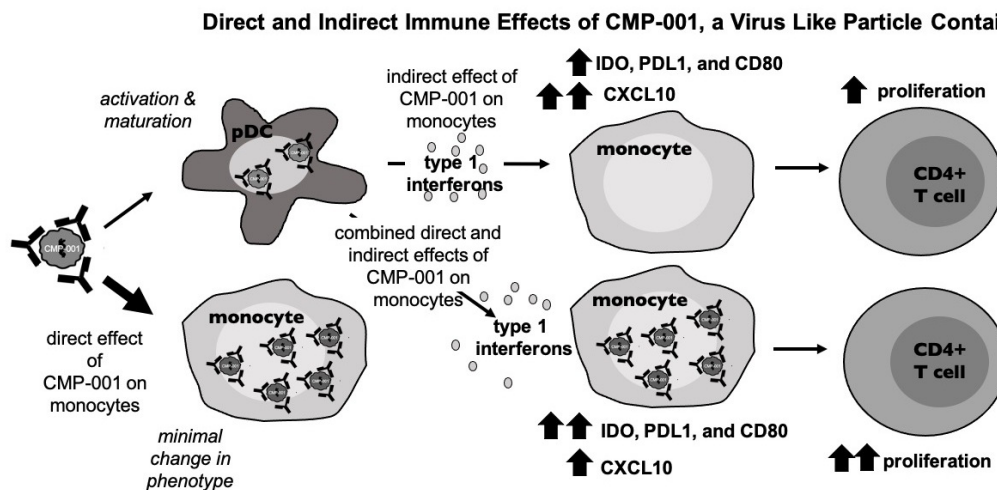**Authors**

Shakoora Sabree, Andrew Voigt, Sue Blackwell, Ajay Vishwakarma, Michael Chimenti, Aliasger Salem, and George Weiner

**Correspondence**

[george-weiner@uiowa.edu](mailto:george-weiner@uiowa.edu)

**In Brief**

CMP-001, a virus-like particle (VLP) containing a TLR9 agonist encapsulated by the Q $\beta$  capsid, is showing promise in early clinical trials when administered intratumorally. CMP-001 coated by anti-Q $\beta$  antibody induces production of Type 1 interferon by plasmacytoid DCs. This interferon then induces changes in multiple cell types including production of CXCL10 and expression of IDO, PDL1, and CD80 by monocytes. Phagocytosis of anti-Q $\beta$ -coated CMP-001 by monocytes has little direct effect on monocytes expression of these proteins but alters their response to Type 1 interferon including enhancing expression of IDO, PDL1, and CD80 and suppressing expression of CXCL10. These cells had an enhanced ability to induce autologous CD4 T cell proliferation.
